# Supplementary material
Source: Springer Nature journal article supplement (https://www.springermedizin.de/resource/supplementary/13054_2013_2884_MOESM1_ESM.pdf/9714114)
Supplement: MOESM1 [file 9714114]

Total admissions in ICU  
(01/01/2006 – 31/01/2013)

n = 5923

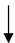

Total suspected VAP episodes  
(1/1/2006 – 31/1/2013)

n = 631

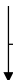

Total analysed suspected VAP episodes  
n = 349

Excluded because :

- inclusion into a clinical trial testing statins (n=52)
- missing data (n=22)
- CPIS < 5 points and ATB D1 = 0 (n = 208)

n = 282

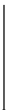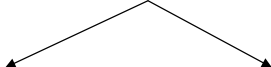

Statin naive patients  
n = 256

Statin previous users  
n = 93

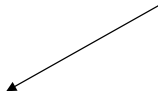

Drug discontinued after  
ICU admission  
n = 41

Drug continued after  
ICU admission  
n = 52
